# Supplementary material for: Boosting the activity of PdAg alloy nanoparticles during H2 production from formic acid induced by CrOx as an inorganic interface modifier
Source: Royal Society of Chemistry journal article supplement (doi:10.1039/d2ey00049k), 2022-11-29
Supplement: d2ey00049k1.pdf [file d2ey00049k1.pdf]

## Supporting Information

### **Boosting Activity of PdAg alloy nanoparticles during H<sub>2</sub> production from formic acid induced by CrO<sub>x</sub> as inorganic interface modifier**

Kohsuke Mori<sup>a,b\*</sup>, Tatsuya Fujita<sup>a</sup>, and Hiromi Yamashita<sup>a,b\*</sup>

<sup>a</sup> Division of Materials and Manufacturing Science, Graduate School of Engineering, Osaka University, 2-1 Yamada-oka, Suita, Osaka 565-0871, Japan.

Tel & FAX: +81-6-6879-7460, +81-6-6879-7457

E-mail: mori@mat.eng.osaka-u.ac.jp, yamashita@mat.eng.osaka-u.ac.jp

<sup>b</sup> Innovative Catalysis Science Division, Institute for Open and Transdisciplinary Research Initiatives (ICS-OTRI), Osaka University, 2-1 Yamada-oka, Suita, Osaka 565-0871, Japan.

**Table S1.** The content of C, H, N wt% over amine-MSC estimated from C.H.N elemental analysis.

| element  | wt%  |
|----------|------|
| Carbon   | 97.0 |
| Hydrogen | 0.0  |
| Nitrogen | 1.7  |

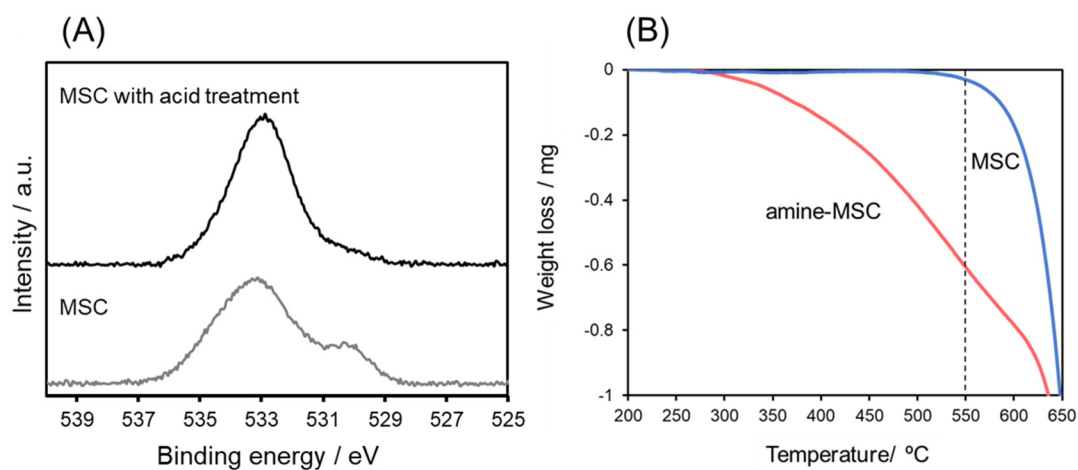

**Figure S1.** (A) O 1S XPS spectra of MSC and MSC with acid treatment, and (B) the weight loss associated to the amine functionality of amine-MSC observed from TG analysis

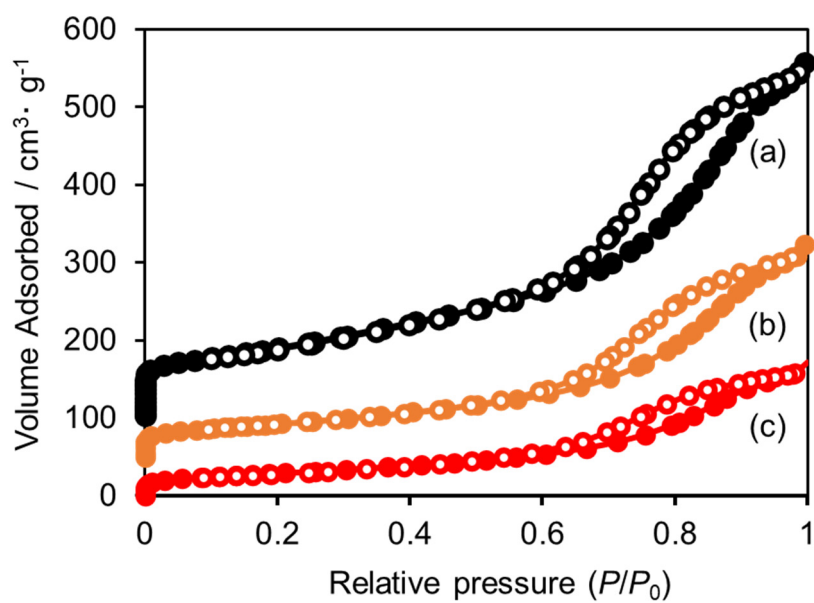

**Figure S2.** N<sub>2</sub> adsorption-desorption isotherms of (a) MSC, (b) amine-MSC, and (c) PdAgCr/amine-MSC.

**Table S2.** The BET surface area and pore volume of each sample.

|                      | Surface area ( $S_{\text{BET}}$ )<br>[m <sup>2</sup> g <sup>-1</sup> ] | Pore volume ( $V_p$ )<br>[cm <sup>3</sup> g <sup>-1</sup> ] |
|----------------------|------------------------------------------------------------------------|-------------------------------------------------------------|
| MSC                  | 320                                                                    | 0.64                                                        |
| amine-MSC            | 153                                                                    | 0.39                                                        |
| PdAgCr/<br>amine-MSC | 104                                                                    | 0.24                                                        |

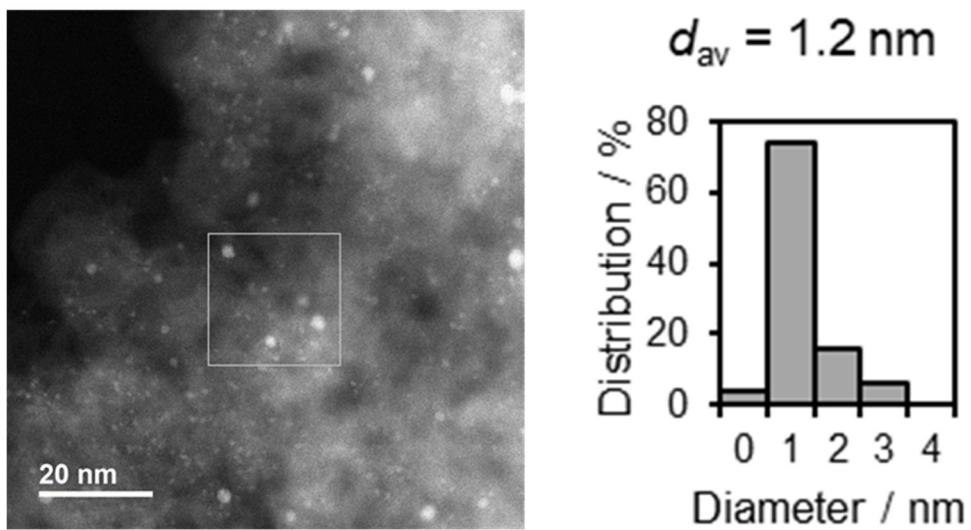

**Figure S3.** STEM image and size distribution of PdAg/amine-MSC.

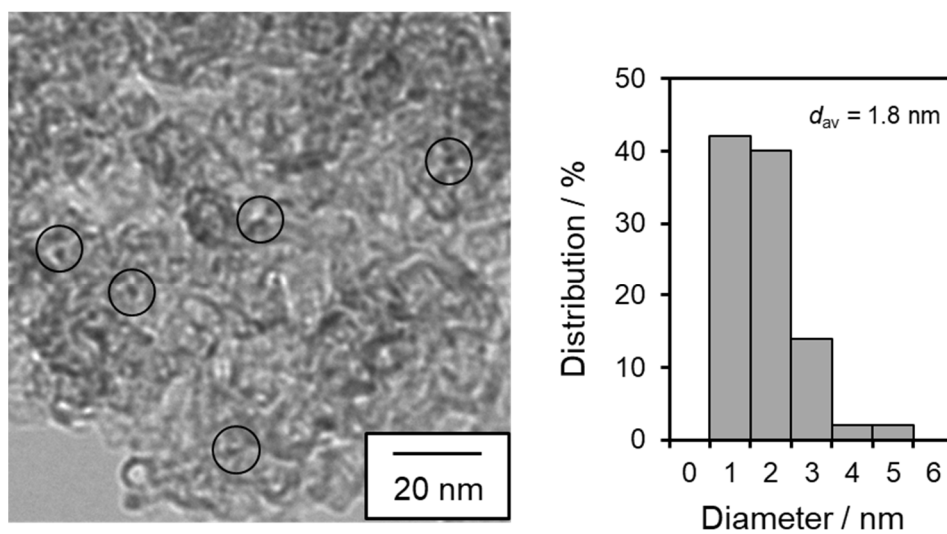

**Figure S4.** TEM image and size distribution of Pd/amine-MSC.

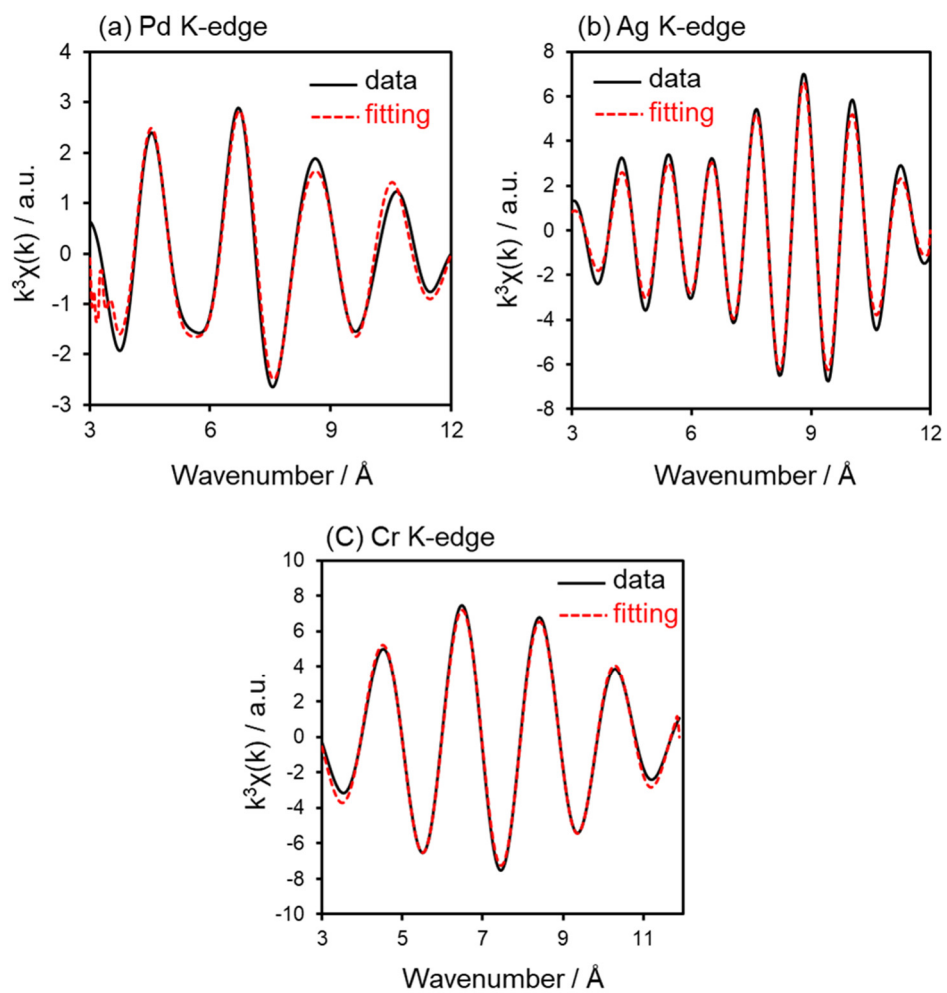

**Figure S5.** Inverse-FT of  $k^3$ -weighted EXAFS (black line) and Curve-fitting results (red dot) for PdAgCr/amine-MSC at (a) Pd K-edge, (b) Ag K-edge, and Cr K-edge.

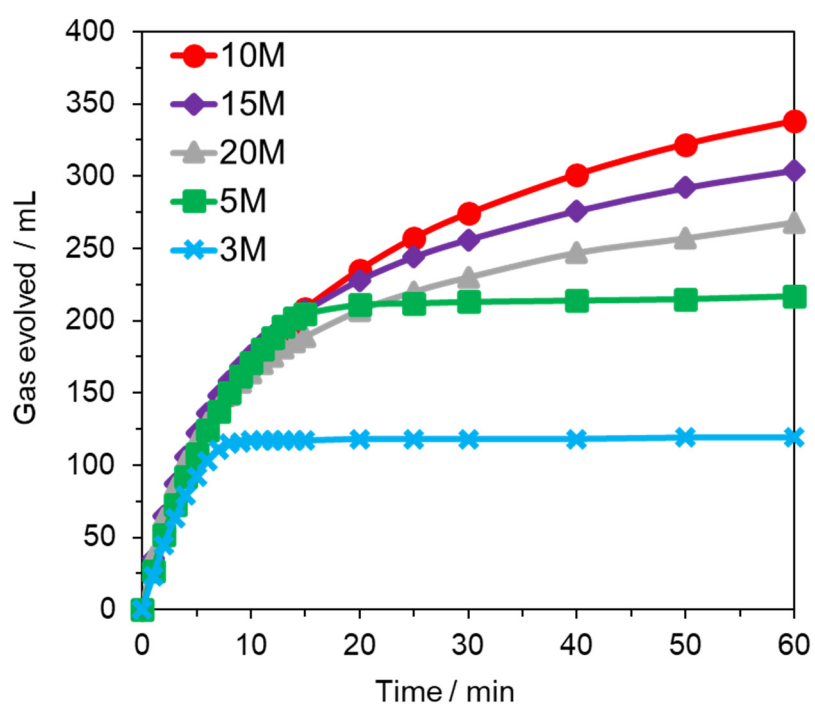

**Figure S6.** Effect of formic acid concentration in the H<sub>2</sub> production from formic acid.

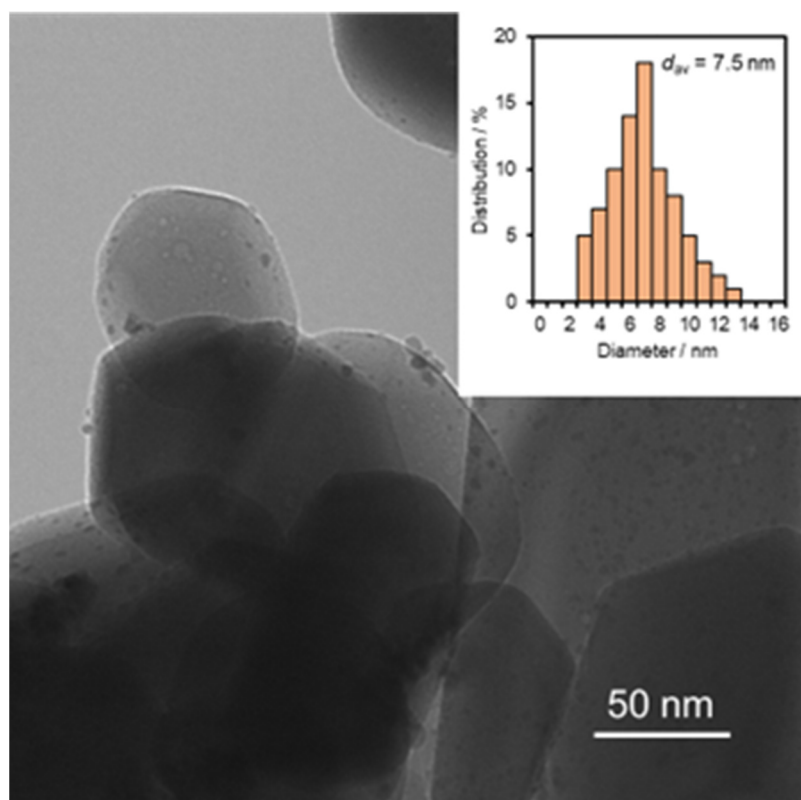

**Figure S7.** TEM image and size distribution diagram of PdAg/Cr<sub>2</sub>O<sub>3</sub>.



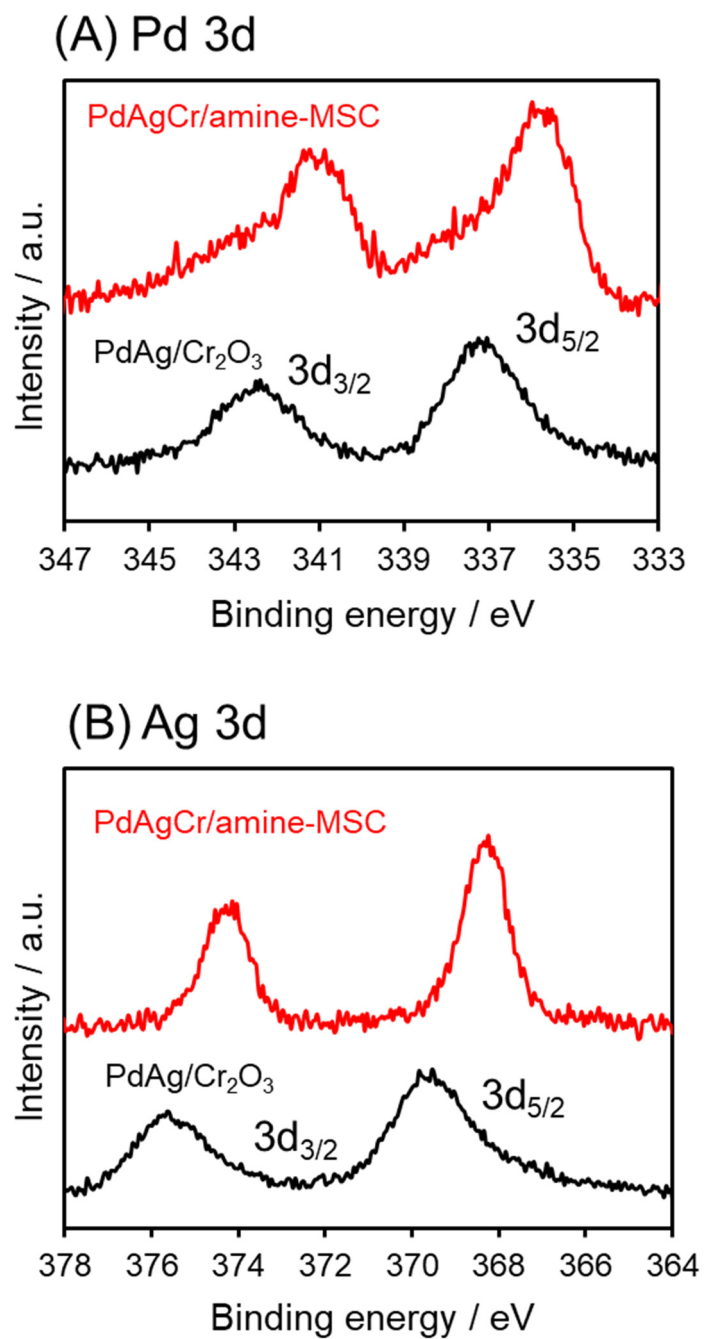

**Figure S8.** (A) Pd 3d and Ag 3d XPS spectra of PdAgCr/amine-MSC and PdAg/Cr<sub>2</sub>O<sub>3</sub>.

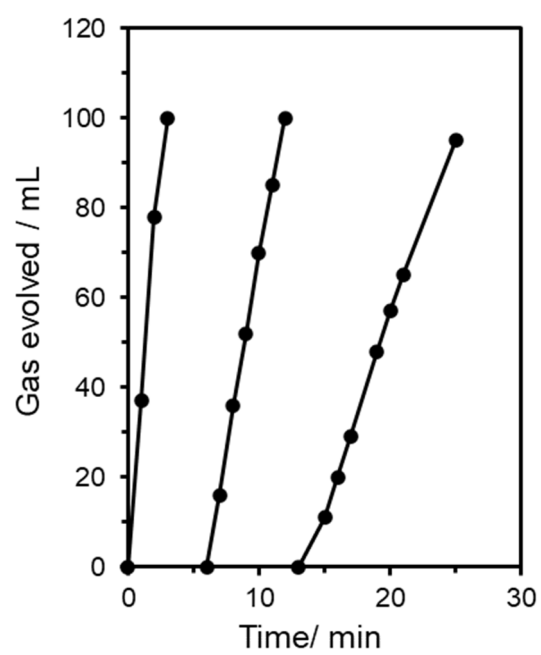

**Figure S9.** Durability test in the dehydrogenation from FA using PdAgCr/amine-MS.

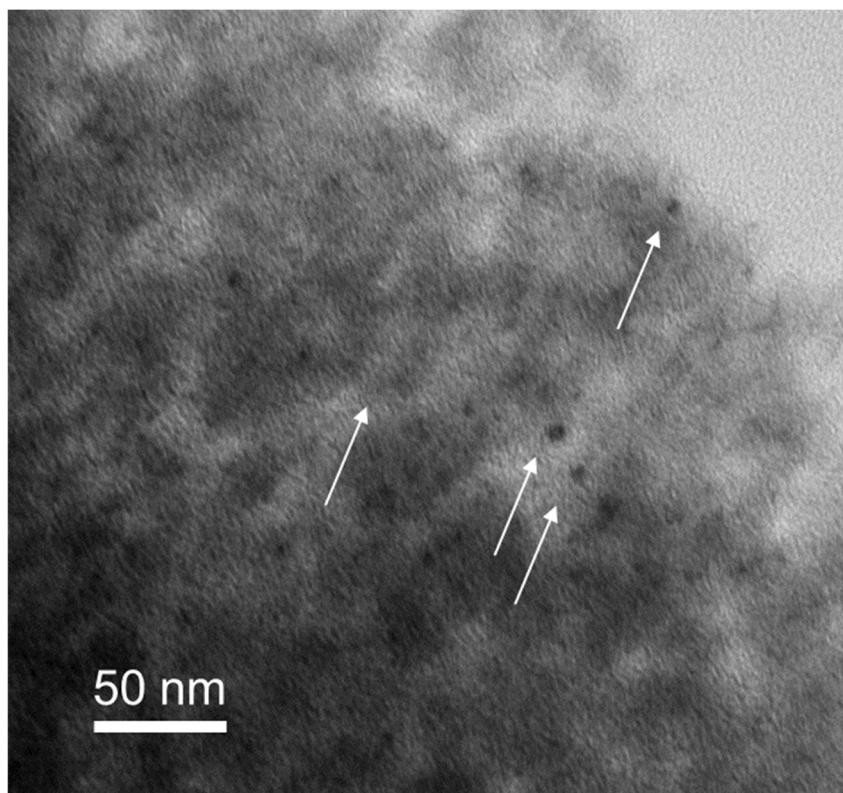

**Figure S10.** TEM image of the recovered PdAgCr/amine-MSC after the dehydrogenation from FA.

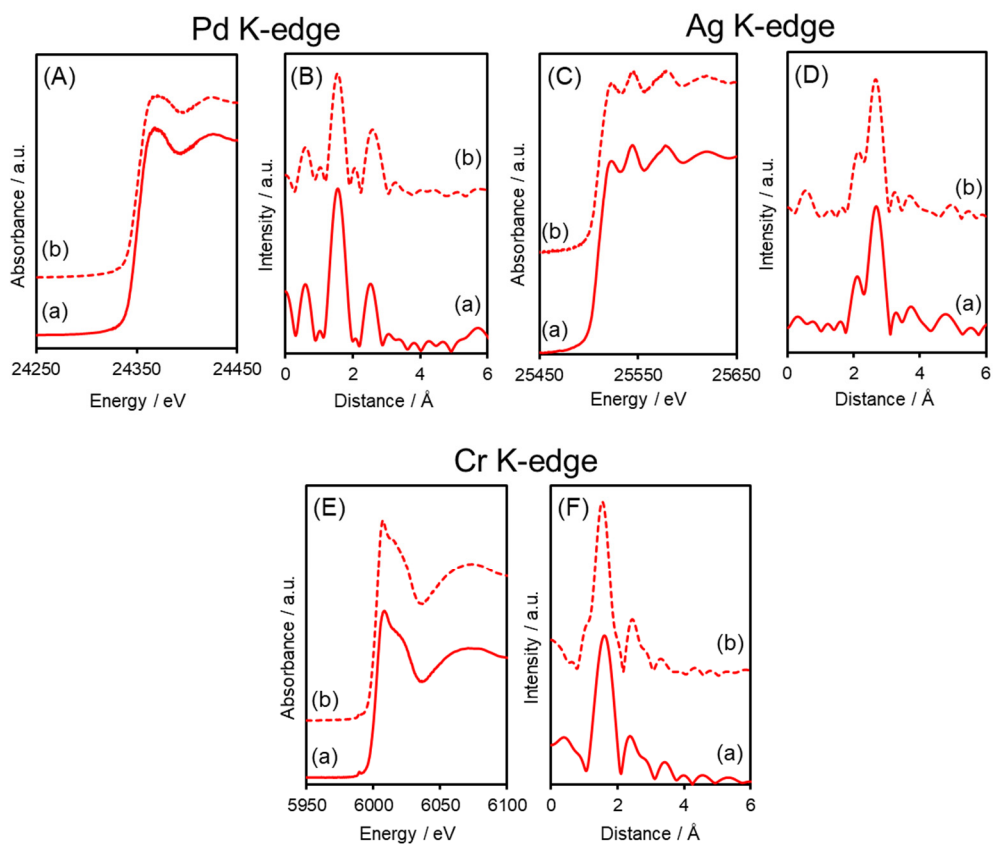

**Figure S11.** (A) Pd K-edge XANES and (B) FT-EXAFS spectra of (a) recovered PdAgCr/amine-MSC, (b) fresh PdAg/amine-MSC, (C) Ag K-edge XANES and (D) FT-EXAFS spectra of (a) recovered PdAgCr/amine-MSC, (b) fresh PdAg/amine-MSC, and (E) Cr K-edge XANES and (F) FT-EXAFS spectra of (a) recovered PdAgCr/amine-MSC, (b) fresh PdAg/amine-MSC.

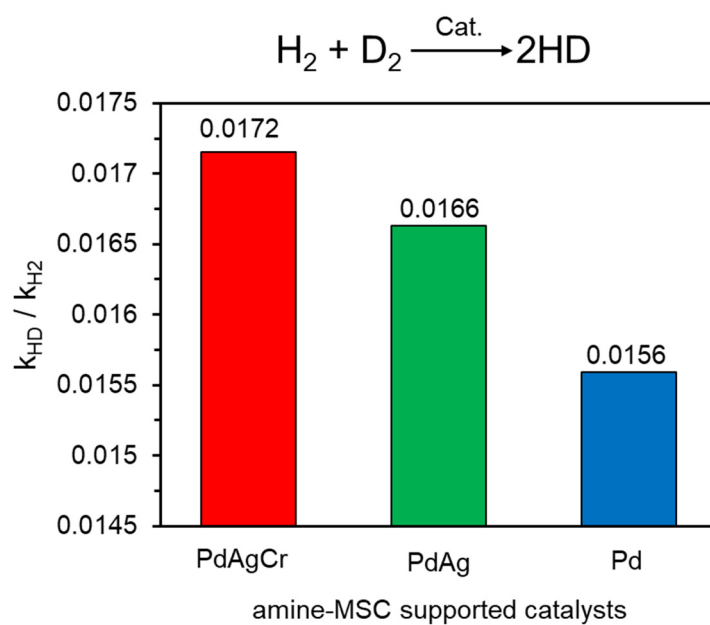

**Figure S12.** Comparison of activity during HD exchange reaction using various amine-MSC supported catalysts.
